# Supplementary material for: Natural emissions of VOC and NO x over Africa constrained by TROPOMI HCHO and NO 2 data using the MAGRITTEv1.1 model
Source: Copernicus journal article supplement (doi:10.5194/egusphere-2024-2912), 2024-09-27
Supplement: Supplementary file [file egusphere-2024-2912-AC2-supplement.pdf]

## Reply to Referee#1

We would like to thank the reviewer for their positive evaluation of the manuscript and for the useful comments and suggestions. Below we address the raised concerns. The reviewer's comments are shown in **bold** and our replies are given in **blue**. Additions to the original text are in **green**.

First, we applied the changes suggested in the Interactive Discussion CC1 'Citations for CAMS-GLOB-SOIL' by David Simpson. More specifically:

**L.149-151:** New references were added to the CAMS-BIO-SOILv2.4 inventory: (Simpson et al., 2023; Simpson and Segers, 2024). Also, we added Steinkamp and Lawrence (2011) and Yienger and Levy (1995) that replace Hudman et al. (2012).

Table 2: Reference to Darras et Simpson (2021) was replaced by Simpson et al. (2023).

Second, we add the following:

**L.105:** "A few other studies advocated for joint inversion and applied a similar approach (Souri et al., 2020, 2024; Wells et al., 2020)."

**The paper provides a comprehensive overview of the NO<sub>x</sub> and VOCs sources in sub-Saharan Africa. It is well written and has a clear outline.**

**There is a large increase in isoprene for region 1 and region 3 in the Northern Hemisphere during the dry season, peaking in March for SVOC, STD and ALBE inversions. At this time and location, the HCHO columns are quite high (figure 10), and this coincides with the peak in fire emissions, which must explain part of the increase in isoprene. At the same, these inversions do not capture the increase in isoprene during fall in region 1. While the precise source attribution will not be solved in this study, you could still provide some context at whether why the isoprene columns are not well represented in both the prior simulations and inversions and provide some hypothesi(e)s to guide future studies. A figure of the seasonal cycle of NO<sub>x</sub> and VOCs surface emissions by source (anthropogenic, biogenic and pyrogenic) for both the prior and the STD inversions (having the other inversions might make the plot too busy) could illustrate this issue.**

We added the Supplementary Section 6 containing Figure S6 that is referenced in the newly added paragraph of the manuscript. We add the following in the manuscript:

**L.679:** "The isoprene peak is not captured by any of the sensitivity inversions. It is worth noting that the interannual variability of CrIS columns in regions 1 and 2 is relatively weak (Fig. S6), except for year 2019, which exhibited enhanced isoprene levels in October, in particular over East Africa (Fig. S6(b)). The months from October to December 2019 were among the wettest on record in Sahel, West, Central and East Africa (Wainwright et al., 2021; WMO, 2019). These extreme conditions might have led to the low TROPOMI HCHO levels because of the reduced

photochemical activity and therefore to lower OH production, and to higher CrIS levels due to relatively longer isoprene lifetimes under cloudy conditions.”

**Even though the increments on anthropogenic emissions are not large, it would be appreciated to add a key point about main takeaways on this subject in the conclusion section.**

We added the following sentence to the conclusion:

**L.734:** “Top-down anthropogenic emissions indicate localised reductions in NO<sub>x</sub> fluxes in Nigeria and in the Highveld region of South Africa, as well as decreased VOC fluxes (by about 20%) across Nigeria. Elsewhere, the changes are small or negligible. ”

**Minor comments:**

**L.47:** “Global bottom-up inventories for soil and lightning fluxes range from 1.3 to 6.6 TgN yr<sup>-1</sup> (Murray, 2016; Vinken et al., 2014; Weng et al., 2020), and from 4 to 34 TgN yr<sup>-1</sup> (Steinkamp and Lawrence, 2011; Yan et al., 2005), respectively”. You switched up soil and lightning.

Corrected.

**L.60:** remove the parenthesis after “Lebel et al., 2011);”

Done.

**L.63:** “By virtue of their global coverage and continuous monitoring, spaceborne data are great alternatives to studying air composition in Africa and are often used to constrain model emission estimates obtained with chemistry-transport models (CTMs).” At this stage of the discussion, you could say: can be used to constrain instead of are often.

Changed.

**L.98:** first definition of TROPOMI and S5P acronyms, so no need to redefine them at line 177.

Corrected.

**L.101:** first instance of MAGRITTE, please define the acronym here.

**L.101:** “For this purpose, the Model of Atmospheric composition at Global and Regional scales using Inversion Techniques for Trace Gas Emissions (MAGRITTEv1.1) chemistry-transport model (Müller et al., 2019)...”

**L.114:** We removed the definition of MAGRITTE since it is now defined in L.101.

**L.105: make it 3 sentences for section 2, 3 and 4. Please be consistent and choose either Sect. or Section.**

The changes were applied in **L.110-111**.

**2.1 MAGRITTEv1.1 chemistry-transport model: If you are using a limited area version of the model, you should specify how you prescribed the boundary conditions.**

We agree. This is now clarified as follows.

**L.117: “The MAGRITTE model is first run in its global configuration at a spatial resolution of  $2^{\circ} \times 2.5^{\circ}$  (latitude, longitude). This simulation provides the boundary conditions for the regional MAGRITTEv1.1 model that covers the African domain delimited by  $30^{\circ}\text{S}$ - $17^{\circ}\text{N}$  and  $18^{\circ}\text{W}$ - $56^{\circ}\text{E}$  with a  $0.5^{\circ} \times 0.5^{\circ}$  horizontal resolution, between the surface and the lower stratosphere with 40 hybrid sigma-pressure levels in the vertical.”**

## Reference

Simpson, D. and Segers, A.: Transboundary particulate matter, photo-oxidants, acidifying and eutrophying components. EMEP Status Report 1/2024, The Norwegian Meteorological Institute, Oslo, Norway, 2024.

Simpson, D., Benedictow, A., and Darras, S.: The CAMS soil emissions: CAMS-GLOB-SOIL, in: CAMS2\_61 – Global and European emission inventories., in: Documentation of CAMS emission inventory products, vol. Chap. 9, 59–70, 2023.

Souri, A. H., Nowlan, C. R., González Abad, G., Zhu, L., Blake, D. R., Fried, A., Weinheimer, A. J., Wisthaler, A., Woo, J.-H., Zhang, Q., Chan Miller, C. E., Liu, X., and Chance, K.: An inversion of  $\text{NO}_x$  and non-methane volatile organic compound (NMVOC) emissions using satellite observations during the KORUS-AQ campaign and implications for surface ozone over East Asia, *Atmospheric Chem. Phys.*, 20, 9837–9854, <https://doi.org/10.5194/acp-20-9837-2020>, 2020.

Souri, A. H., González Abad, G., Wolfe, G. M., Verhoelst, T., Vigouroux, C., Pinardi, G., Compernelle, S., Langerock, B., Duncan, B. N., and Johnson, M. S.: Feasibility of robust estimates of ozone production rates using satellite observations, *EGUsphere*, 1–36, <https://doi.org/10.5194/egusphere-2024-1947>, 2024.

Steinkamp, J. and Lawrence, M. G.: Improvement and evaluation of simulated global biogenic soil  $\text{NO}$  emissions in an AC-GCM, *Atmospheric Chem. Phys.*, 11, 6063–6082, <https://doi.org/10.5194/acp-11-6063-2011>, 2011.

Wainwright, C. M., Finney, D. L., Kilavi, M., Black, E., and Marsham, J. H.: Extreme rainfall in East Africa, October 2019–January 2020 and context under future climate change, *Weather*, 76, 26–31, <https://doi.org/10.1002/wea.3824>, 2021.

Wells, K. C., Millet, D. B., Payne, V. H., Deventer, M. J., Bates, K. H., de Gouw, J. A., Graus, M., Warneke, C., Wisthaler, A., and Fuentes, J. D.: Satellite isoprene retrievals constrain emissions and atmospheric oxidation, *Nature*, 585, 225–233, <https://doi.org/10.1038/s41586-020-2664-3>, 2020.

WMO: State of the Climate in Africa, World Meteorological Organization (WMO), 2019.

Yienger, J. J. and Levy, H.: Empirical model of global soil-biogenic  $\text{NO}_x$  emissions, *J. Geophys. Res. Atmospheres*, 100, 11447–11464, <https://doi.org/10.1029/95JD00370>, 1995.
